# Supplementary material for: Highly Tough, Stretchable and Self-Healing Polyampholyte Elastomers with Dual Adhesiveness
Source: MDPI journal article supplement (doi:10.3390/ijms23094548), 2022-04-20
Supplement: s1 [file s1]

## Supporting Information

Highly tough, stretchable and self-healing polyampholyte elastomers with dual adhesiveness

Pengfei Yin, Yang Liu\*, Dan Huang and Chao Zhang\*

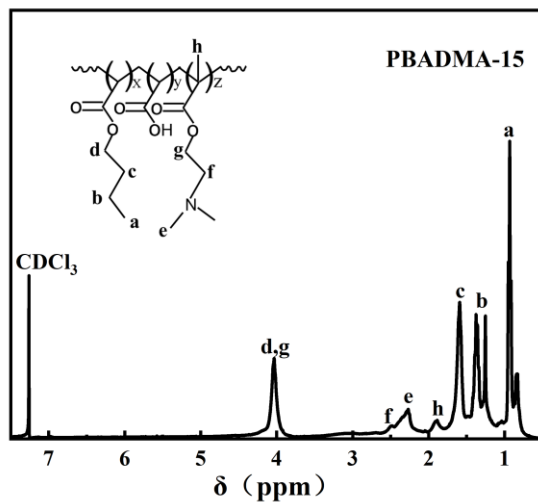

**Figure S1.** The <sup>1</sup>H NMR spectrum of PBADMA-15.

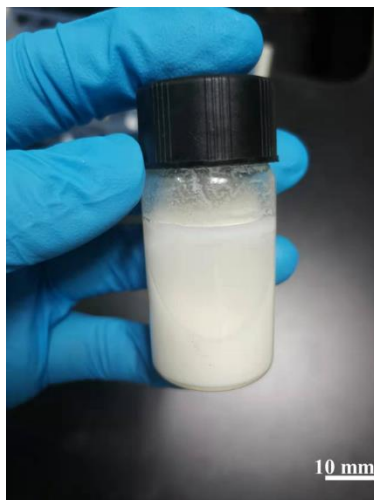

**Figure S2.** Milky precipitates were observed when the molar percentage of AA and DMA in the precursor was higher than 41%.

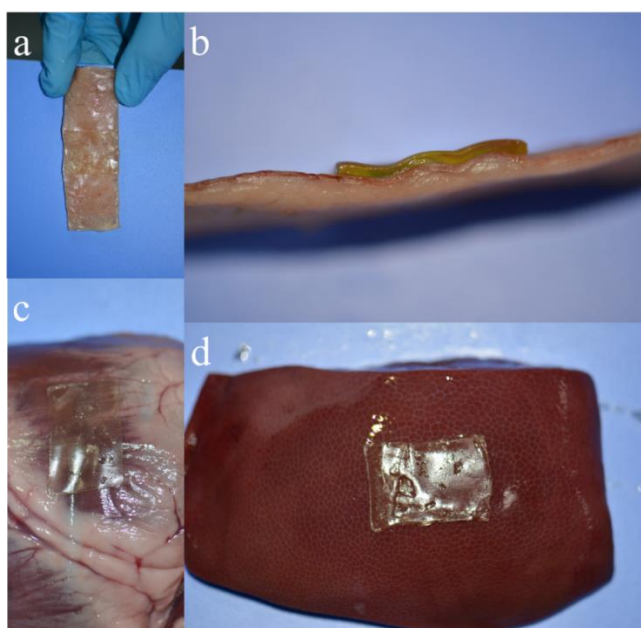

**Figure S3.** PBADMA-15 shows good adhesion to pork tissues, including: (a) Pork skin; (b) shows the lateral view of (a); (c) Pork heart and (d) Pork liver.
